# Supplementary material for: Attitudes of medical students in Khartoum, Sudan towards the doctor-patient relationship: a cross-sectional study
Source: PeerJ journal article supplement (doi:10.7717/peerj.15434), 2023-07-03
Supplement: Questionnaire.pdf [file Questionnaire.pdf]

# Attitudes of medical students in Khartoum, Sudan towards the doctor-patient relationship: a cross-sectional study

---

\* Required

1. Age \*

---

2. Gender \*

*Mark only one oval.*

Male(0)

Female(1)

3. Study year \*

*Mark only one oval.*

3rd year( Batch 93) (0)

4th year( Batch 92) (1)

5th year( Batch 91) (2)

6th year( Batch 94) (3)

The statements below refer to beliefs that people might have concerning doctors, patients and medical care. Read each item and then indicate how much you agree or disagree. Each of the statements is on a scale of 1 to 6.
